# Supplementary material
Source: Springer Nature journal article supplement (https://www.springermedizin.de/resource/supplementary/12955_2010_839_MOESM2_ESM.pdf/9561426)

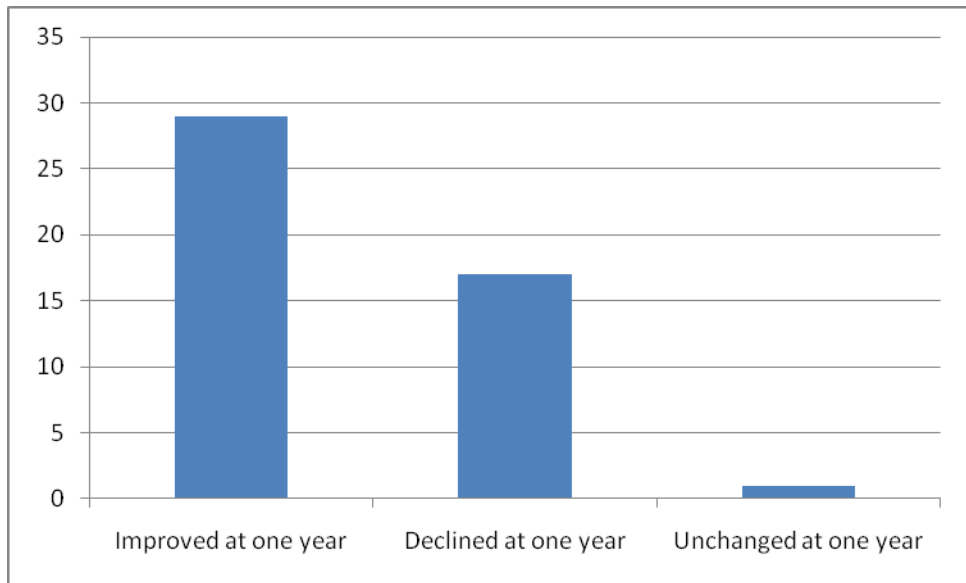

Y-axis shows number of patients

Supplement: MOESM2 [file 9561426]
